# Supplementary material for: Serotyping and Antimicrobial Resistance Profile of Enteric Nontyphoidal Salmonella Recovered from Febrile Neutropenic Patients and Poultry in Egypt
Source: MDPI journal article supplement (doi:10.3390/antibiotics10050493), 2021-04-26
Supplement: s1 [file s1]

**Table S1:** Antibigram analysis of the 50 human *Salmonella* serovars against the 28 tested antimicrobial agents

[illegible]

**Continue (Table S1.)**

[illegible]

**Continue (Table S1.)**

[illegible]

[illegible]

**Table S2:** Antibigram analysis of the 50 poultry *Salmonella* serovars against the 28 tested antimicrobial agents

[illegible]

**Continue (Table S2)**

[illegible]

**Continue (Table S2)**

[illegible]



**Continue (Table S2)**

[illegible]

[illegible]

**Table S3:** Prevalence of MDR isolates among human, poultry serovars and the standard strain.

| Code | Serovar        | Ampicillin | Oxytetracycline | Erythromycin | Trimoxazole/sulphmethoprim | Chloramphenicol | Cefotaxime | Ciprofloxacin | No. of R |
|------|----------------|------------|-----------------|--------------|----------------------------|-----------------|------------|---------------|----------|
|      |                | AMP 10     | O 30            | E 15         | COT 25                     | C 30            | CTX 30     | CIP 5         |          |
| H1   | S. Typhimurium | R          | R               | R            | S                          | S               | R          | S             | 4        |
| H2   |                | R          | R               | R            | R                          | I               | R          | S             | 5        |
| H3   |                | R          | I               | R            | S                          | S               | R          | S             | 3        |
| H4   |                | R          | I               | R            | S                          | S               | R          | S             | 3        |
| H5   |                | R          | I               | R            | S                          | R               | R          | S             | 4        |
| H6   |                | R          | I               | R            | S                          | S               | R          | S             | 3        |
| H7   |                | R          | I               | R            | S                          | R               | R          | S             | 4        |
| H8   |                | R          | I               | R            | S                          | S               | R          | S             | 3        |
| H9   |                | R          | R               | R            | S                          | S               | R          | S             | 4        |
| H10  |                | S          | R               | R            | S                          | I               | R          | S             | 3        |
| H11  | S. Enteritidis | R          | R               | R            | S                          | S               | R          | S             | 4        |
| H12  |                | R          | R               | R            | S                          | S               | R          | S             | 4        |
| H13  |                | R          | R               | R            | R                          | S               | R          | S             | 5        |
| H14  |                | R          | R               | R            | S                          | S               | R          | S             | 4        |
| H15  |                | R          | S               | R            | R                          | S               | R          | S             | 4        |
| H16  |                | R          | R               | R            | S                          | S               | R          | S             | 4        |
| H17  |                | R          | R               | R            | S                          | S               | R          | S             | 4        |
| H18  |                | R          | R               | R            | S                          | S               | R          | S             | 4        |
| H19  | S. Lumberhurst | R          | R               | R            | S                          | I               | R          | S             | 4        |
| H20  |                | R          | R               | R            | S                          | S               | R          | S             | 4        |
| H21  |                | R          | R               | R            | S                          | I               | R          | S             | 4        |
| H22  |                | R          | R               | R            | S                          | S               | R          | S             | 4        |
| H23  |                | R          | R               | R            | S                          | I               | R          | S             | 4        |
| H24  |                | R          | R               | R            | S                          | S               | R          | S             | 4        |
| H25  |                | R          | R               | R            | S                          | I               | R          | S             | 4        |
| H26  |                | R          | R               | R            | S                          | S               | R          | S             | 4        |
| H27  | S. Tumodi      | R          | I               | R            | S                          | S               | R          | S             | 3        |
| H28  |                | R          | R               | R            | I                          | R               | R          | S             | 5        |
| H29  |                | R          | R               | R            | S                          | I               | R          | S             | 4        |
| H30  |                | R          | I               | R            | S                          | S               | R          | S             | 3        |
| H31  | S. Tesive      | R          | S               | R            | S                          | S               | R          | S             | 3        |
| H32  |                | R          | I               | R            | S                          | R               | R          | S             | 4        |
| H33  |                | R          | S               | R            | S                          | S               | R          | S             | 3        |
| H34  |                | R          | I               | R            | S                          | R               | R          | S             | 4        |
| H35  | S. Butontan    | R          | S               | R            | S                          | S               | R          | S             | 3        |
| H36  |                | R          | R               | R            | S                          | R               | R          | S             | 5        |
| H37  |                | R          | I               | R            | S                          | S               | R          | S             | 3        |
| H38  | S. Antum       | R          | R               | R            | S                          | I               | R          | S             | 4        |

|     |                   |   |   |   |   |   |   |   |   |
|-----|-------------------|---|---|---|---|---|---|---|---|
| H39 |                   | R | R | R | S | I | R | S | 4 |
| H40 |                   | R | R | R | S | I | R | S | 4 |
| H41 | S. Taksony        | R | R | R | I | R | R | S | 5 |
| H42 |                   | R | R | R | I | R | R | S | 5 |
| H43 | S. Hull           | R | I | R | S | S | R | S | 3 |
| H44 |                   | R | S | R | S | S | R | S | 3 |
| H45 | S. Agama          | R | R | R | S | I | R | S | 4 |
| H46 |                   | R | R | R | S | I | R | S | 4 |
| H47 | S. Dublin         | R | R | R | S | I | R | S | 4 |
| H48 |                   | R | R | R | S | I | R | S | 4 |
| H49 | S. Blegdam        | R | R | R | I | S | R | S | 4 |
| H50 |                   | R | R | R | I | S | R | S | 4 |
| STD | S. Poona standard | R | R | R | S | I | R | S | 4 |
| A51 | S. Typhimurium    | R | R | R | S | S | I | S | 3 |
| A52 |                   | R | R | R | I | S | R | S | 4 |
| A53 | S. Enteritidis    | R | R | R | S | S | R | S | 4 |
| A54 |                   | R | R | R | R | S | R | S | 4 |
| A55 |                   | R | R | R | R | S | R | S | 5 |
| A56 |                   | R | R | R | R | S | R | S | 5 |
| A57 |                   | R | R | R | R | S | R | S | 5 |
| A58 | S. Lumberhurst    | R | R | R | S | S | R | S | 4 |
| A59 | S. Tsevie         | R | R | R | S | I | I | S | 3 |
| A60 | S. Butontan       | R | R | R | I | S | R | S | 4 |
| A61 | S. Anatum         | R | R | R | S | I | R | S | 4 |
| A62 |                   | R | R | R | S | I | R | S | 4 |
| A63 | S. Agama          | R | R | R | R | S | R | I | 5 |
| A64 | S. Taksony        | R | R | R | R | R | R | R | 7 |
| A65 | S. Blegdam        | R | R | R | S | S | R | S | 4 |
| A66 |                   | R | R | R | R | S | R | S | 5 |
| A67 | S. Kentucky       | R | R | R | R | R | R | R | 7 |
| A68 |                   | R | R | R | R | R | R | R | 7 |
| A69 | S. Bouake         | R | R | R | R | R | R | R | 7 |
| A70 |                   | R | R | R | R | R | R | R | 7 |
| A71 | S. Chester        | R | R | R | I | R | R | R | 6 |
| A72 | S. Infantis       | R | R | R | R | S | R | S | 5 |
| A73 | S. Furuch         | R | R | R | S | I | R | S | 4 |
| A74 | S. Cremieu        | R | R | R | R | R | R | S | 6 |
| A75 | S. Virchow        | R | R | R | S | S | R | S | 4 |
| A76 | S. Kedougou       | R | R | R | S | S | R | S | 4 |
| A77 | S. Sanktjohan     | R | R | R | I | S | R | S | 4 |
| A78 | S. Stratford      | R | R | R | S | S | R | S | 4 |
| A79 | S. Mississippi    | R | R | R | S | S | I | S | 3 |

|      |                |   |   |   |   |   |   |   |   |
|------|----------------|---|---|---|---|---|---|---|---|
| A80  | S. Nitra (dog) | R | R | R | I | S | R | S | 4 |
| A81  | S. Papuana     | R | R | R | S | S | R | S | 4 |
| A82  | S. Bardo       | R | R | R | I | S | R | S | 4 |
| A83  | S. Bonariensis | R | R | R | S | I | R | R | 5 |
| A84  | S. Boecker     | R | R | R | S | I | R | R | 5 |
| A85  | S. Newport     | R | R | R | R | S | R | S | 5 |
| A86  | S. Colindal    | R | R | R | S | I | R | S | 4 |
| A87  | S. Hato        | R | R | R | R | S | R | S | 5 |
| A88  | S. Montevideo  | S | R | R | S | I | R | S | 3 |
| A89  | S. Farsta      | R | R | R | S | I | I | S | 3 |
| A90  | S. Kralingen   | R | R | R | I | S | R | S | 4 |
| A91  | S. Fillmore    | R | R | R | S | S | I | S | 3 |
| A92  | S. Gueuletapee | R | R | R | I | S | R | S | 4 |
| A93  | S. Atakpame    | R | R | R | S | S | R | S | 4 |
| A94  | S. Stanly      | R | R | R | R | S | R | S | 5 |
| A95  | S. Kottbus     | R | R | R | R | S | R | S | 5 |
| A96  | S. Magherafelt | R | R | R | R | S | R | S | 5 |
| A97  | S. Sekondi     | R | R | R | R | R | R | R | 7 |
| A98  | S. Gallinarum  | R | R | R | S | S | R | S | 4 |
| A99  | S. Volta       | R | S | R | S | S | R | S | 3 |
| A100 | S. Newlands    | R | R | R | I | S | R | S | 4 |

**Table S4:** Virulence genes and Plasmid Profile Analysis (PPA) of the 50 human *Salmonella* serovars.

| Serovars              | Code | <i>invA</i> | <i>SpiA</i> | <i>stn</i> | <i>pefA</i> | <i>spvC</i> | PPA |
|-----------------------|------|-------------|-------------|------------|-------------|-------------|-----|
| <b>S. Typhimurium</b> | H1   | +           | +           | -          | -           | -           | -   |
|                       | H2   | +           | +           | +          | +           | +           | +   |
|                       | H3   | +           | +           | +          | -           | -           | +   |
|                       | H4   | +           | +           | -          | -           | +           | +   |
|                       | H5   | +           | +           | +          | +           | +           | +   |
|                       | H6   | +           | -           | +          | +           | -           | NR  |
|                       | H7   | +           | +           | -          | -           | +           | NR  |
|                       | H8   | +           | -           | -          | -           | -           | NR  |
|                       | H9   | +           | +           | +          | +           | -           | NR  |
|                       | H10  | +           | -           | +          | -           | -           | NR  |
| <b>S. Enteritidis</b> | H11  | +           | -           | -          | -           | +           | +   |
|                       | H12  | +           | -           | -          | +           | +           | +   |
|                       | H13  | +           | -           | -          | -           | +           | +   |
|                       | H14  | +           | -           | -          | -           | +           | NR  |
|                       | H15  | +           | +           | -          | +           | -           | NR  |
|                       | H16  | +           | -           | +          | -           | -           | NR  |
|                       | H17  | +           | -           | -          | -           | -           | NR  |
|                       | H18  | +           | -           | +          | +           | -           | NR  |
| <b>S. Lumberhurst</b> | H19  | +           | +           | -          | -           | -           | NR  |
|                       | H20  | +           | +           | +          | +           | +           | NR  |
|                       | H21  | +           | -           | -          | -           | -           | NR  |
|                       | H22  | +           | +           | +          | +           | -           | +   |
|                       | H23  | +           | +           | +          | +           | -           | NR  |
|                       | H24  | +           | +           | +          | +           | -           | NR  |
|                       | H25  | +           | -           | -          | -           | +           | NR  |
|                       | H26  | +           | +           | -          | -           | -           | NR  |
| <b>S. Tumodi</b>      | H27  | +           | -           | -          | -           | +           | NR  |
|                       | H28  | +           | +           | +          | +           | -           | +   |
|                       | H29  | +           | -           | -          | -           | +           | NR  |
|                       | H30  | +           | +           | -          | -           | -           | NR  |

|             |     |   |   |   |   |   |    |
|-------------|-----|---|---|---|---|---|----|
| S. Tesive   | H31 | + | - | + | + | - | +  |
|             | H32 | + | - | - | - | + | NR |
|             | H33 | + | - | - | - | + | NR |
|             | H34 | + | - | + | + | - | NR |
| S. Butontan | H35 | + | + | - | - | + | NR |
|             | H36 | + | + | + | + | - | +  |
|             | H37 | + | - | + | + | - | NR |
| S. Antum    | H38 | + | - | + | - | - | NR |
|             | H39 | + | + | + | + | - | NR |
|             | H40 | + | + | + | + | - | NR |
| S. Taksony  | H41 | + | - | - | - | + | NR |
|             | H42 | + | - | - | - | + | NR |
| S. Hull     | H43 | + | + | + | + | - | NR |
|             | H44 | + | + | + | - | - | NR |
| S. Agama    | H45 | + | + | + | + | - | NR |
|             | H46 | + | - | - | - | + | NR |
| S. Dublin   | H47 | + | - | - | - | - | NR |
|             | H48 | + | - | - | - | + | NR |
| S. Blegdam  | H49 | + | - | - | - | + | NR |
|             | H50 | + | - | - | - | + | NR |

\*+,detected, -, not detected, and NR, no plasmid DNA was detected of the ampicillin sensitive serovars. *invA*: encoding invasion protein, *spiA*: encoding type 3 secretion system secretin, *spvC*: encoding secreted effector protein (*Salmonella* plasmid virulence), *stn*: encoding heat-labile *Salmonella* enterotoxin, *pefA*: encoding plasmid-encoded fimbrial protein.

**Table S5:** Virulence genes and Plasmid Profile Analysis (PPA) of the 50 poultry *Salmonella* serovars and *S. Poona* standard strain

| Serovars              | Code | <i>invA</i> | <i>SpiA</i> | <i>Stn</i> | <i>pefA</i> | <i>spvC</i> | PPA |
|-----------------------|------|-------------|-------------|------------|-------------|-------------|-----|
| <i>S. Typhimurium</i> | A51  | +           | +           | +          | -           | -           | -   |
|                       | A52  | +           | +           | -          | -           | -           | +   |
| <i>S. Enteritidis</i> | A53  | +           | +           | +          | -           | -           | -   |
|                       | A54  | +           | +           | +          | +           | -           | NR  |
|                       | A55  | +           | +           | +          | -           | -           | NR  |
|                       | A56  | +           | +           | +          | +           | -           | NR  |
|                       | A57  | +           | +           | +          | -           | -           | NR  |
| <i>S. Lumberhurst</i> | A58  | +           | +           | +          | +           | -           | NR  |
| <i>S. Tsevie</i>      | A59  | +           | +           | +          | -           | -           | NR  |
| <i>S. Butontan</i>    | A60  | +           | +           | +          | +           | -           | NR  |
| <i>S. Anatum</i>      | A61  | +           | +           | +          | -           | -           | NR  |
|                       | A62  | +           | +           | +          | +           | -           | NR  |
| <i>S. Agama</i>       | A63  | +           | +           | -          | -           | +           | +   |
| <i>S. Taksony</i>     | A64  | +           | +           | +          | +           | -           | NR  |
| <i>S. Blegdam</i>     | A65  | +           | +           | +          | -           | -           | -   |
|                       | A66  | +           | +           | -          | -           | +           | NR  |
| <i>S. Kentucky</i>    | A67  | +           | +           | +          | +           | -           | -   |
|                       | A68  | +           | +           | +          | -           | -           | NR  |
| <i>S. Bouake</i>      | A69  | +           | +           | +          | +           | -           | NR  |
|                       | A70  | +           | +           | +          | +           | -           | NR  |
| <i>S. Chester</i>     | A71  | +           | +           | +          | -           | -           | NR  |
| <i>S. Infantis</i>    | A72  | +           | +           | +          | +           | -           | -   |
| <i>S. Furuch</i>      | A73  | +           | +           | -          | -           | +           | -   |
| <i>S. Cremieu</i>     | A74  | +           | +           | +          | +           | -           | -   |
| <i>S. Virchow</i>     | A75  | +           | -           | -          | -           | +           | +   |
| <i>S. Kedougou</i>    | A76  | +           | +           | +          | +           | -           | NR  |
| <i>S. Sanktjohan</i>  | A77  | +           | +           | -          | -           | +           | +   |
| <i>S. Stratford</i>   | A78  | +           | +           | -          | -           | +           | +   |
| <i>S. Mississippi</i> | A79  | +           | +           | +          | +           | +           | +   |
| <i>S. Nitra (dog)</i> | A80  | +           | +           | +          | -           | -           | NR  |



|                                 |            |   |   |   |   |   |    |
|---------------------------------|------------|---|---|---|---|---|----|
| <i>S. Papuana</i>               | A81        | + | + | + | + | - | +  |
| <i>S. Bardo</i>                 | A82        | + | + | + | + | - | -  |
| <i>S. Bonariensis</i>           | A83        | + | + | - | - | + | +  |
| <i>S. Boecker</i>               | A84        | + | + | + | + | - | NR |
| <i>S. Newport</i>               | A85        | + | + | + | + | - | NR |
| <i>S. Colindal</i>              | A86        | + | + | + | + | - | NR |
| <i>S. Hato</i>                  | A87        | + | - | + | - | - | NR |
| <i>S. Montevideo</i>            | A88        | + | - | + | + | + | NR |
| <i>S. Farsta</i>                | A89        | + | + | + | - | + | NR |
| <i>S. Kralingen</i>             | A90        | + | - | + | - | + | NR |
| <i>S. Fillmore</i>              | A91        | + | - | + | + | - | NR |
| <i>S. Gueuletapee</i>           | A92        | + | + | - | - | - | -  |
| <i>S. Atakpame</i>              | A93        | + | + | + | + | + | NR |
| <i>S. Stanly</i>                | A94        | + | - | - | - | - | NR |
| <i>S. Kottbus</i>               | A95        | + | - | - | - | - | NR |
| <i>S. Magherafelt</i>           | A96        | + | + | + | - | - | -  |
| <i>S. Sekondi</i>               | A97        | + | + | + | + | - | NR |
| <i>S. Gallinarum</i>            | A98        | + | - | - | - | - | NR |
| <i>S. Volta</i>                 | A99        | + | - | - | - | - | NR |
| <i>S. Newlands</i>              | A100       | + | + | + | + | - | NR |
| <b><i>S. Poona standard</i></b> | <b>STD</b> | + | + | + | + | + | +  |

\*+,detected, -, not detected, and NR, no plasmid DNA was detected of the ampicillin sensitive serovars. *invA*: encoding invasion protein, *spiA*: encoding type 3 secretion system secretin, *spvC*: encoding secreted effector protein (*Salmonella* plasmid virulence), *stn*: encoding heat-labile *Salmonella* enterotoxin, *pefA*: encoding plasmid-encoded fimbrial protein.

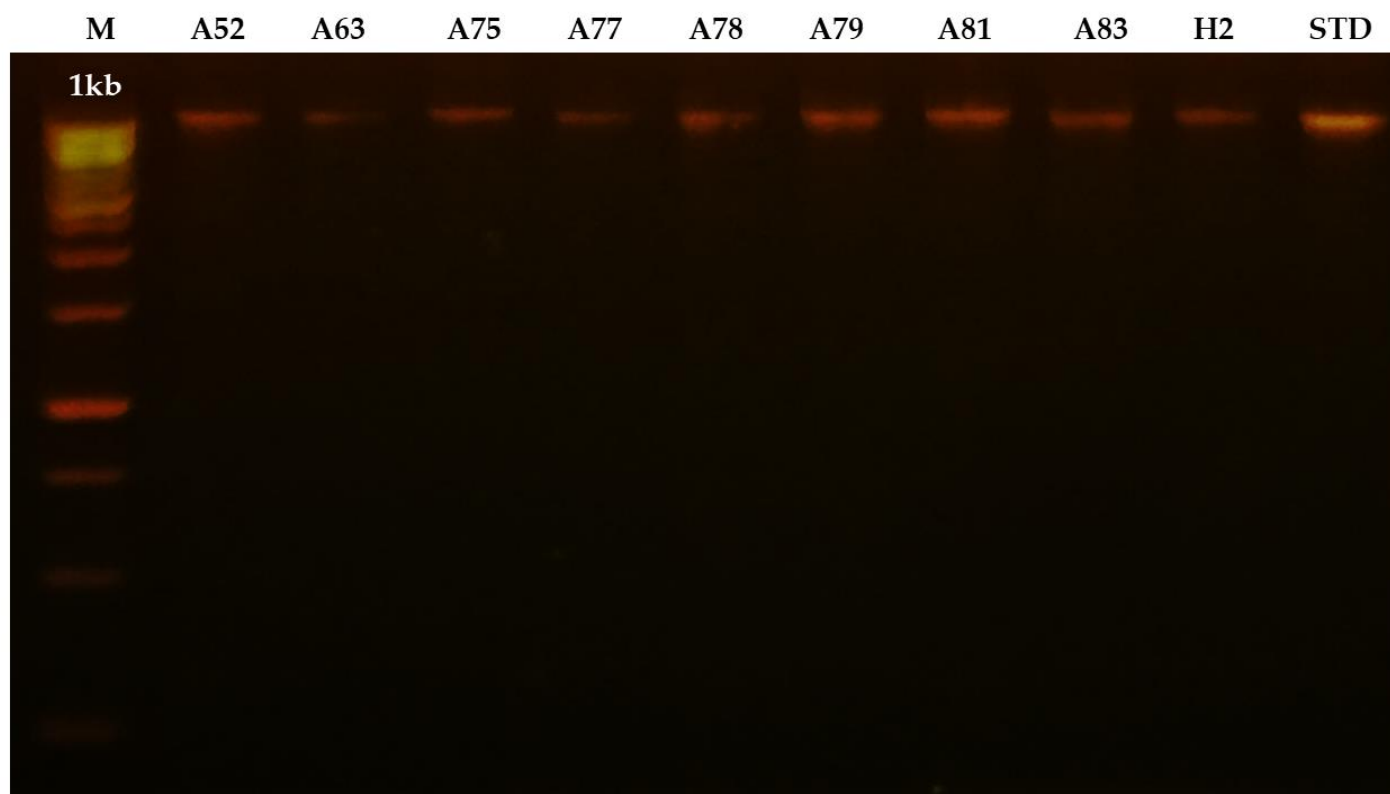

**Figure S1A.** Plasmid profile analysis of different ampicillin resistant *Salmonella* serovars isolates, and M, 1kb size marker. STD plasmid extracted from the *S. Poona* Standard serovar.

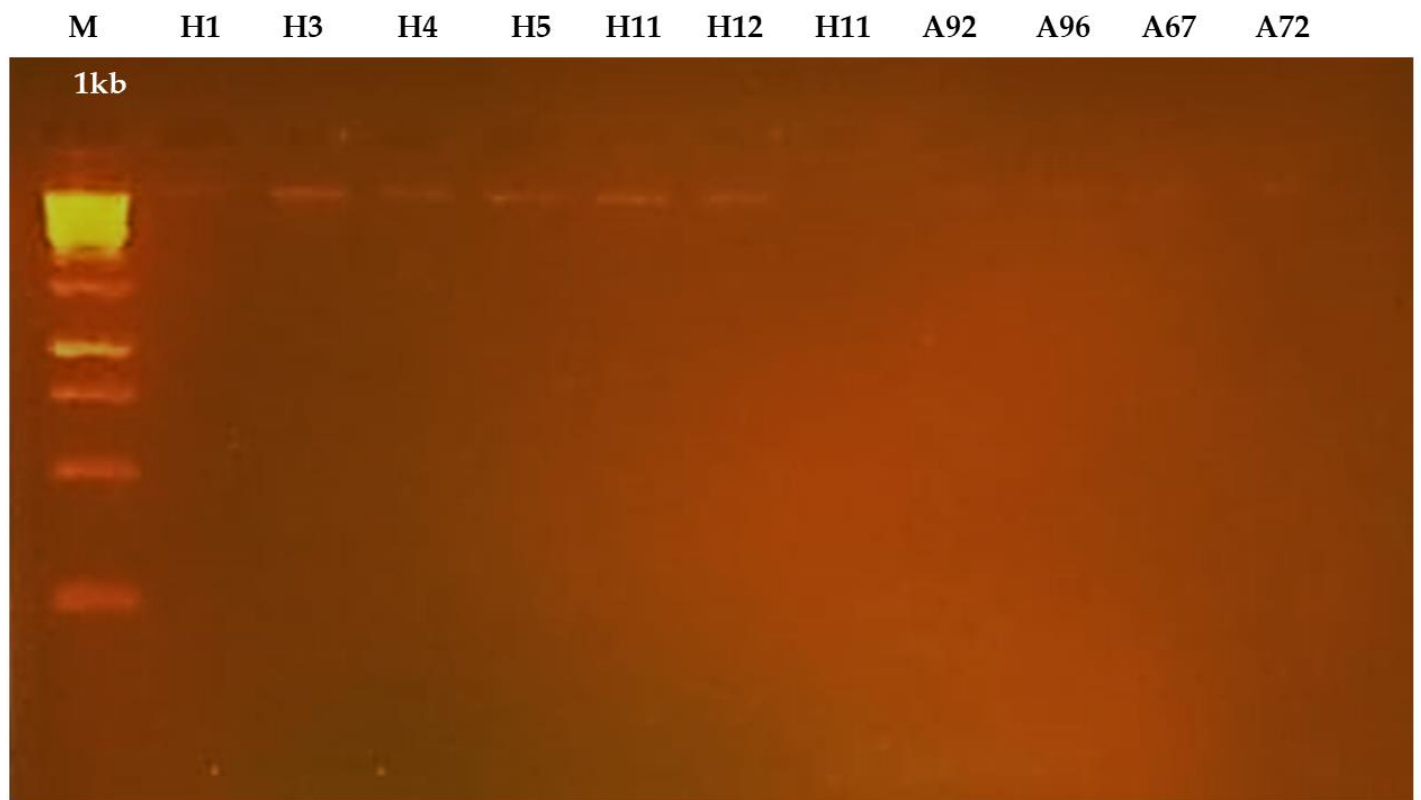

**Figure S1B.** Plasmid profile analysis of different ampicillin resistant isolates, and M, 1kb size marker.

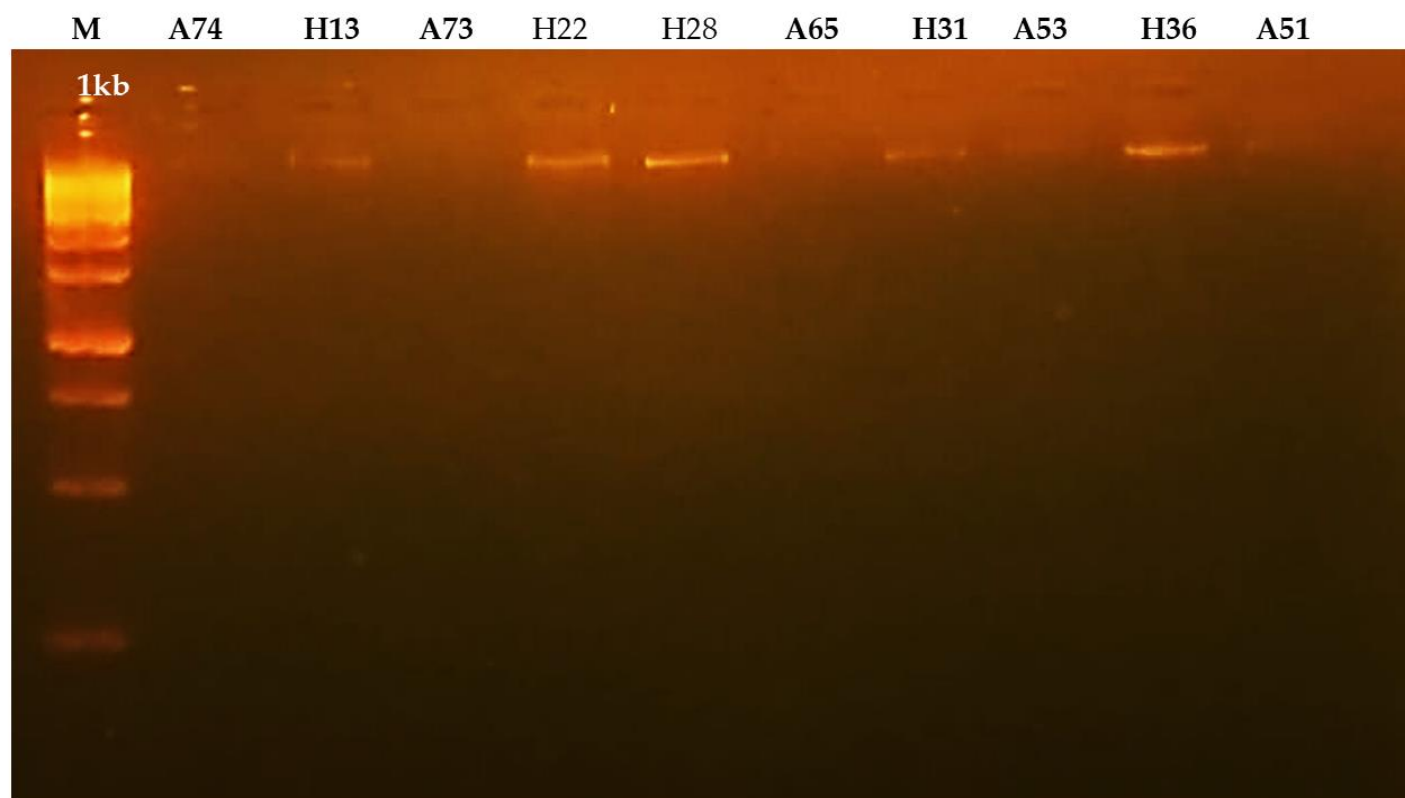

**Figure S1C.** Plasmid profile analysis of different ampicillin resistant isolates, and M, 1kb size marker.

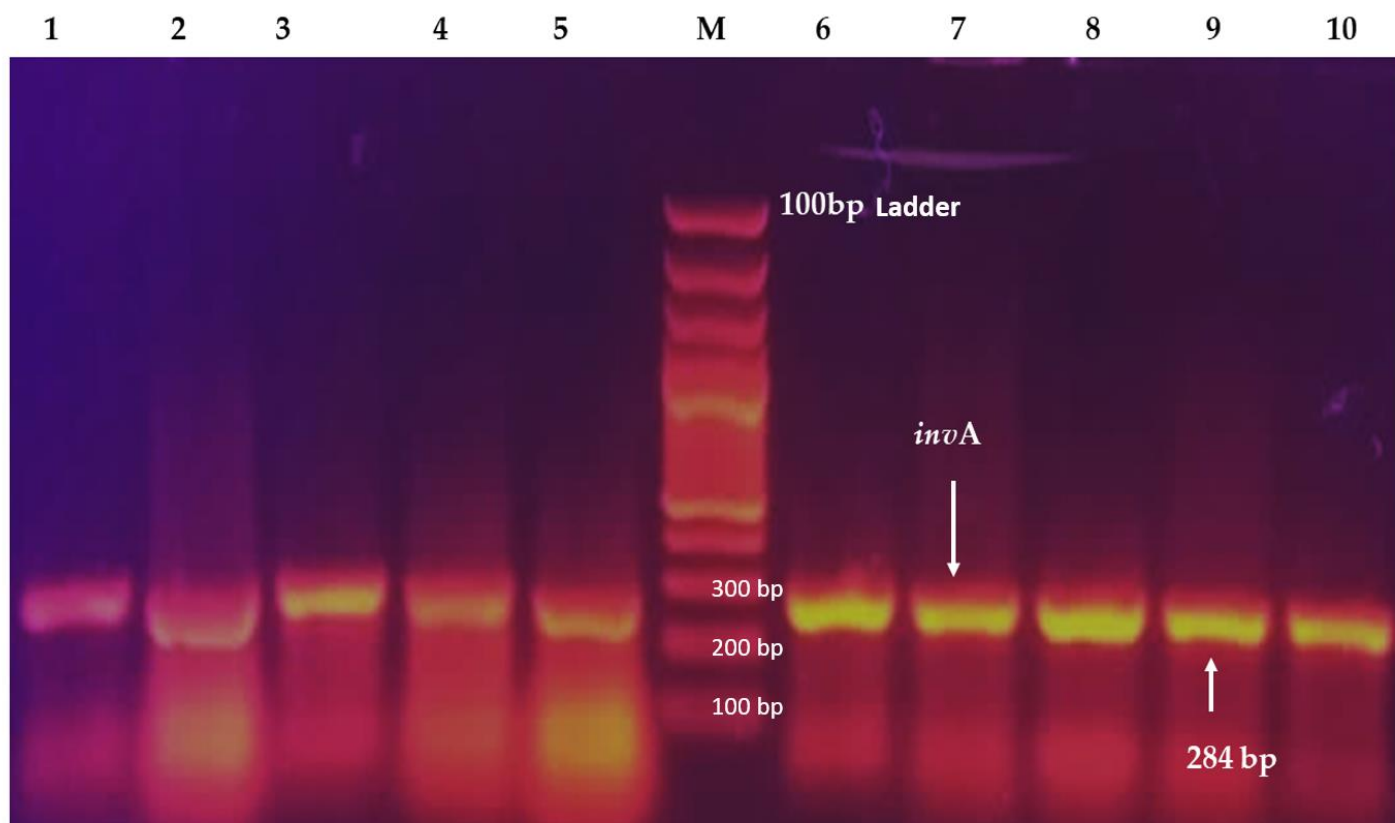

**Figure S2.** Agarose gel electrophoresis of PCR products of *invA* gene (284 bp) of some selected isolates. Lanes: 1, *S. Typhimurium*; 2, *S. Typhimurium*; 3, *S. Typhimurium*; 4, *S. Typhimurium*; 5, *S. Dublin*; 6, *S. Enteritidis*; 7, *S. Enteritidis*; 8, *S. Enteritidis*; 9, *S. Tesive*; 10, *S. Lumberhurst*; and M, 100 bp size marker.

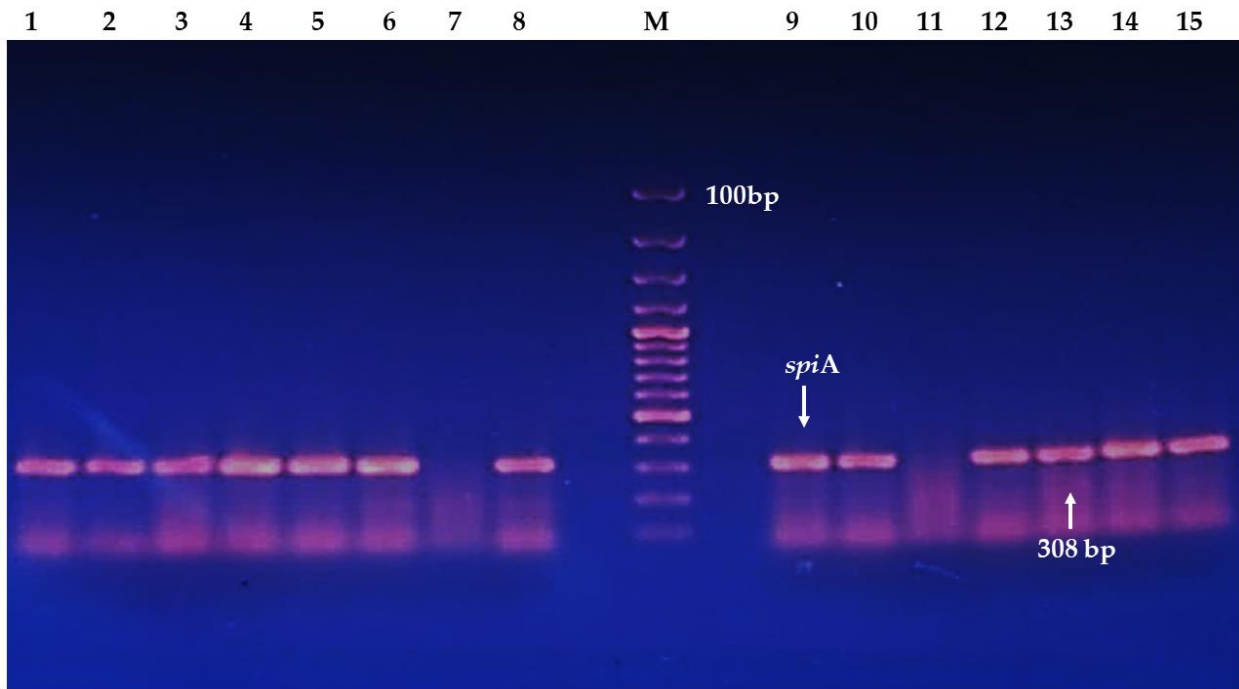

**Figure S3.** Agarose gel electrophoresis of PCR products of *spiA* gene (308 bp) of some selected isolates. Lanes: 1, *S. Bonaresis*; 2, *S. Bardo*; 3, *S. Papuana*; 4, *S. Lumberhurst*; 5, *S. Typhimurium* 15; 6, *S. Lumberhurst*; 7, *S. Tumodi*; 8, *S. Enteritidis*; 9, *S. chester*; 10, *S. Typhimurium*; 11, *S. Tesive*; 12, *S. Typhimurium*; 13, *S. Typhimurium*; 14, *S. Lumberhurst*; 15, *S. Lumberhurst*; and M, 100 bp size

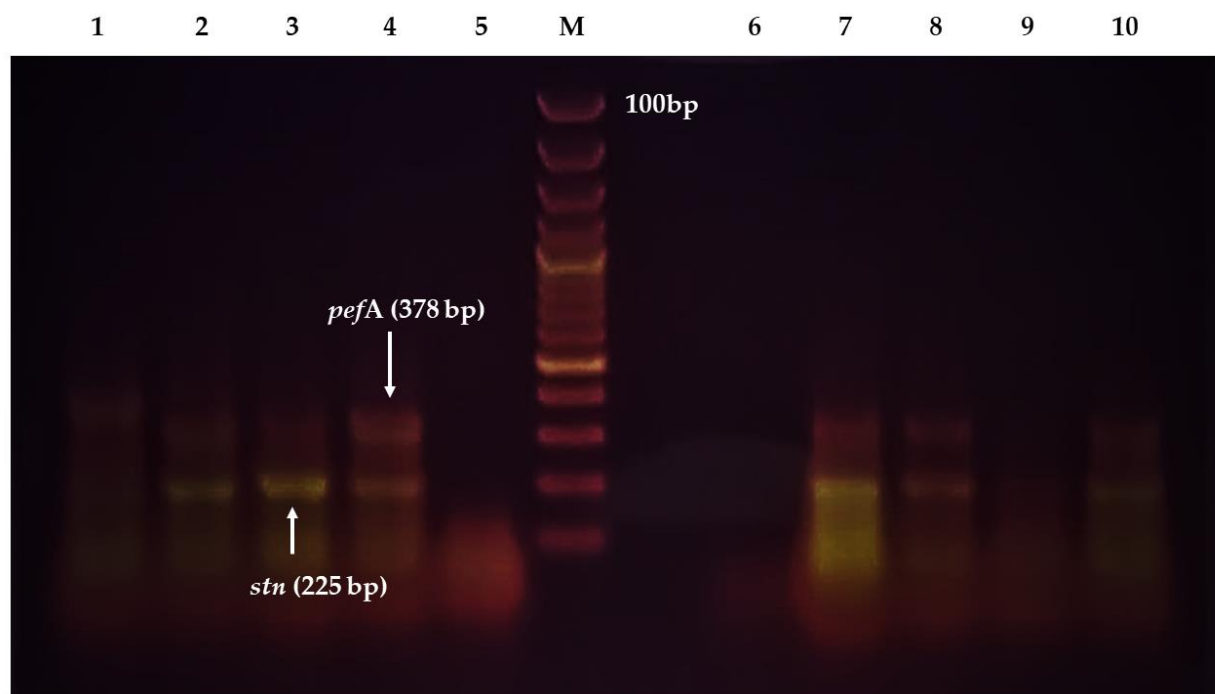

**Figure S4.** Agarose gel electrophoresis of PCR products of *stn* gene (223 bp) and *pefA* gene (378 bp) of some selected isolates. Lanes: 1, *S. Bonaresis*; 2, *S. Bardo*; 3, *S. Papuana*; 4, *S. Lumberhurst*; 5, *S. Typhimurium*; 6, *S. Lumberhurst*; 7, *S. Tumodi*; 8, *S. Enteritidis*; 9, *S. chester*; 10, *S. Typhimurium*; and M, 100 bp size

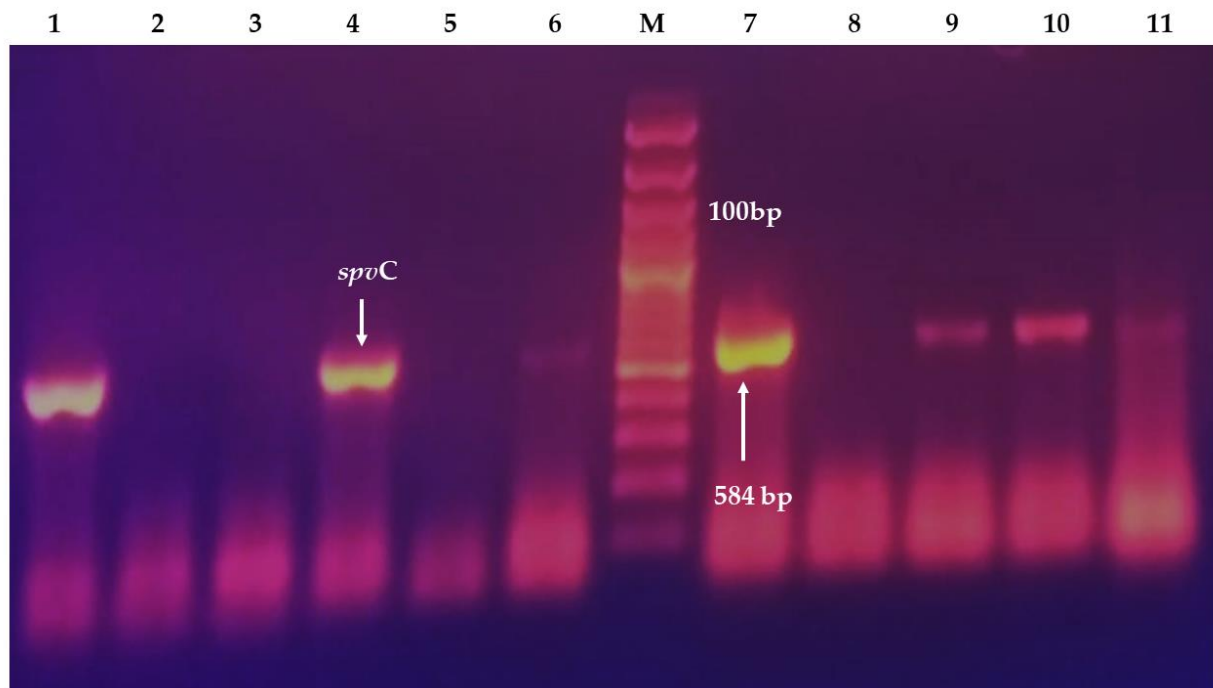

**Figure S5.** Agarose gel electrophoresis of PCR products of *spvC* gene (584 bp) of some selected isolates. Lanes: 1, *S. Typhimurium*; 2, *S. Typhimurium*; 3, *S. Typhimurium*; 4, *S. Typhimurium*; 5, *S. Dublin*; 6, *S. Enteritidis*; 7, *S. Enteritidis*; 8, *S. Enteritidis*; 9, *S. Tesive*; 10, *S. Lumberhurst*; 11, *S. Tumodi*; and M, 100 bp size marker



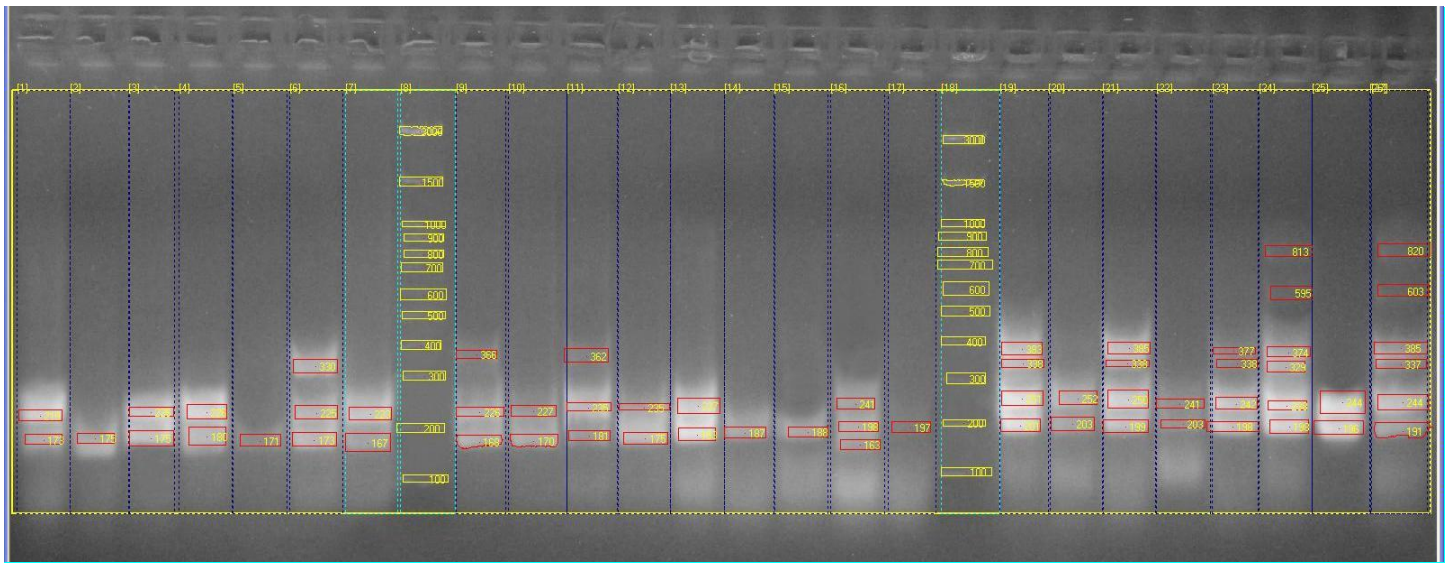

**Figure S6.** ERIC-PCR of the 24 (12 human and 12 poultry) serovars and L, 100 bp size ladder.
